# Supplementary material for: Reviews and syntheses: Photosynthetic oxygen evolution in plants-A potential inheritance from early abiotic oxygen production on Earth
Source: Copernicus journal article supplement (doi:10.5194/egusphere-2025-1764), 2025-05-05
Supplement: Supplementary file [file egusphere-2025-1764-AC5-supplement.zip]

# Reviews and syntheses: Photosynthetic oxygen evolution in plants-A potential inheritance from early abiotic oxygen production on Earth

Yanyou Wu<sup>1,\*†</sup>, Mohamed Aboueldahab<sup>1,2,†</sup>, Congqiang Liu<sup>3,\*</sup>

<sup>1</sup>State Key Laboratory of Environmental Geochemistry, Institute of Geochemistry, Chinese Academy of Sciences, 550081, Guiyang, China

<sup>2</sup> University of Chinese Academy of Sciences, 100049, Beijing, China

<sup>3</sup>School of Earth System Science, Tianjin University, 300072, Tianjin, China

\*Correspondence: wuyanyou@mail.gyig.ac.cn (Yanyou Wu), liucongqiang@tju.edu.cn (Congqiang Liu)

†These authors should be considered co-first authors.

**Abstract.** The phenomenon of photosynthetic oxygen evolution by plants, as the basis of life on our planet, has long attracted scientists from various disciplines. This process converts natural solar energy and inorganic carbon into organic matter and oxygen, which are not only crucial for maintaining terrestrial ecosystems but also reveal the early evolution of the Earth's biosphere. In this review, we present evidence from various disciplines, such as paleontology, biochemistry, stratigraphy, geochemistry, and molecular evolutionary biology, to support the proposition that abiotic processes generated the earliest detected oxygen on Earth. The photodecomposition of bicarbonate ( $\text{HCO}_3^-$ ) under sunlight, which releases oxygen and carbon dioxide in photosynthetic organisms, is, in our opinion, an inheritance of the abiotic oxygen release mechanism. In contrast, the water photolytic oxygen release mechanism evolved in response to the insufficient availability of inorganic carbon sources ( $\text{CO}_2/\text{HCO}_3^-$ ) in the environment. This review provides insights into the evolution of oxygen production mechanisms and their implications for the design of artificial photosynthetic reactors.

## 1 Background and Challenge

Oxygenic photosynthesis, originating in cyanobacteria and spreading to green algae and plants, is a key event in Earth's geological and biological history (Hohmann - Marriott and Blankenship, 2011). This process significantly changed the planet's atmosphere, introducing free oxygen and triggering the Great Oxidation Event (GOE), which enabled the rise and diversification of

complex, oxygen-dependent life (Schirmer et al., 2013). The current consensus suggests that photosynthetic oxygen originates from water. However, recent evidence, including the bicarbonate effect, pH-dependent thylakoid carbonic anhydrase activity, photosystem II (PSII) crystalline structure insights, and re-evaluated heavy oxygen isotope labeling experiments, indicates that both water and bicarbonate photolysis contribute to photosynthetic oxygen generation. Examining bicarbonate photolysis thermodynamic efficiency, photosynthetic stoichiometry, the global water-carbon cycle, and the Dole effect reveals bicarbonate photolysis as a fundamental process, equally significant to water photolysis in photosynthetic oxygen evolution (Wu, 2021; 2023; Guo et al., 2024).

The evolution of photosynthetic organisms is inherently tied to the escalation of atmospheric oxygen. As described in Fig.1, Earth has experienced two GOEs: the first, 2.4-2 billion years ago, marked by cyanobacteria's emergence, saw atmospheric oxygen levels gradually rise to 1-2% of modern levels. Following this initial GOE, oxygen concentrations likely plateaued until about 850 million years ago, after which they ascended to approximately 20% of present atmospheric levels, with potential spikes to 30–35% during the Carboniferous era. The second GOE is closely associated with the proliferation of photosynthetic eukaryotes, which substantially enhanced photosynthesis and witnessed a notable increase in algal and lichen productivity, especially in terrestrial environments (Holland, 2006). Elevated atmospheric O<sub>2</sub> levels during the Carboniferous (~360–300 Ma) coincided with vascular plant evolution and enhanced carbon sequestration (Berner, 1999). Currently, the rise in atmospheric O<sub>2</sub> levels is correlated with cyanobacteria's emergence, leading scientists to conclude that aerobic photosynthesis independently originated within these taxa (Fischer et al., 2016; Hohmann - Marriott and Blankenship, 2011).

However, the previous conclusion hinges on the premise that significant abiotic oxygen sources were absent in the early Earth's atmosphere (Fischer et al., 2016). Recently, researchers studying the Clarion-Clipperton Zone's seafloor ecosystem have discovered that polymetallic nodules in ancient sediment layers 4000 meters deep emit considerable oxygen (Sweetman et al., 2024). This challenges the idea that early Earth lacked significant abiotic oxygen sources. Moreover, photosynthesis is a derived trait in extant taxa, including cyanobacteria, phylogenetically (Fischer et al., 2016). Challenging the view that aerobic photosynthesis originated exclusively in cyanobacteria, we hypothesize that it may have evolved from early

abiotic oxygen-generating processes, with bicarbonate photolysis being an inherited trait from primitive Earth's abiotic oxygen production mechanisms shown in Fig. 2. This review critically examines the hypothesis across three key domains: early abiotic oxygen production, the potential ancestry of PSII, and the two-substrate photosynthetic oxygen evolution.

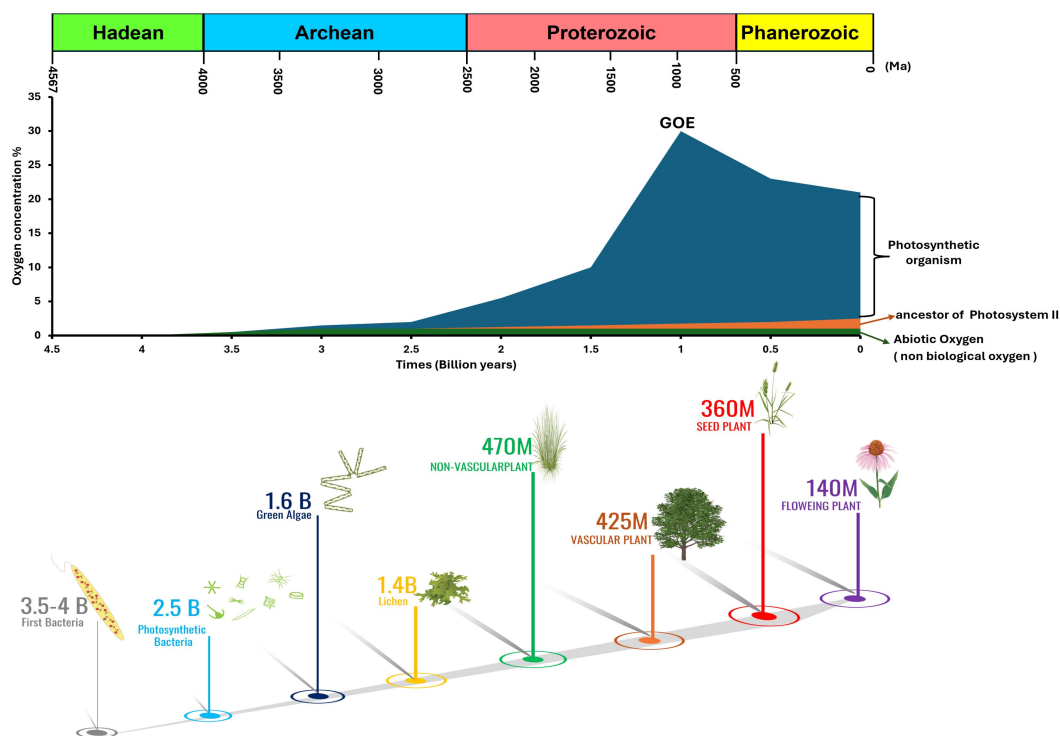

**Figure 1.** The connection between oxygen levels in Earth's atmosphere, the evolutionary milestones in plant life, and the early processes that contributed to oxygen generation. Here, we highlight the role of abiotic oxygen-generating processes before the emergence of biological oxygen production. The enzyme carbonic anhydrase is suggested as a potential precursor to PS II, a key component of the photosynthetic process responsible for oxygen production. It also depicts the evolution of the two-substrate photosynthetic oxygen-evolving process, which is critical for the significant rise in oxygen levels, particularly during the Great Oxidation Event (GOE), which leads to the diversification of complex plant life.

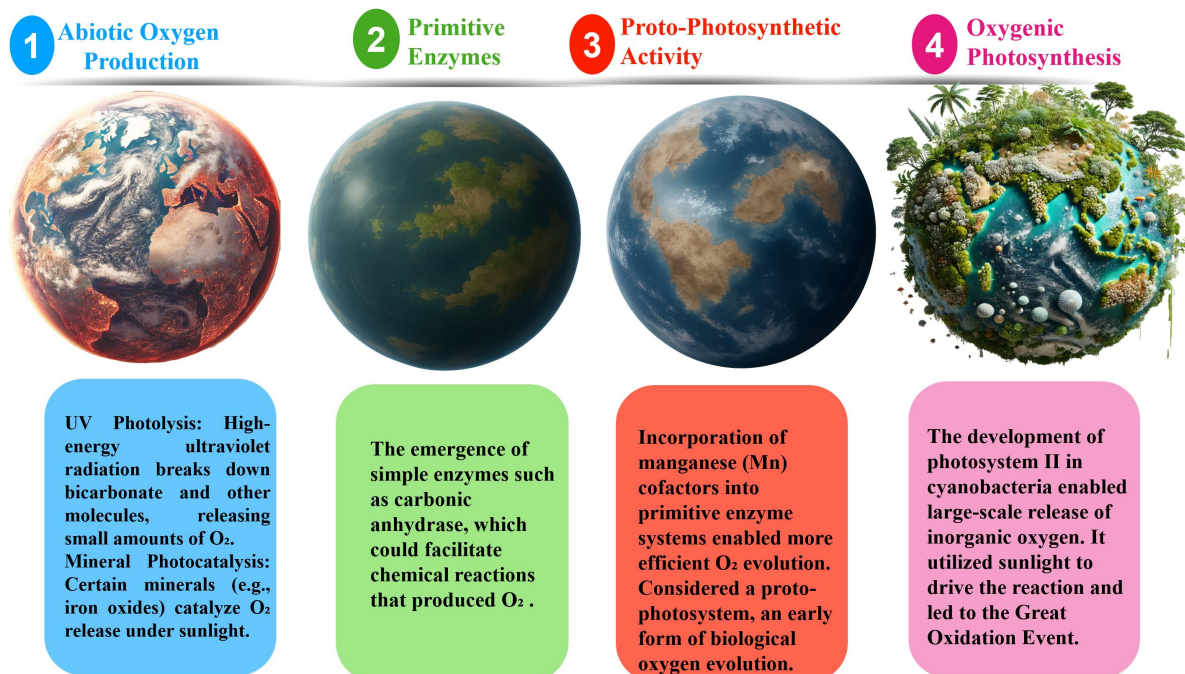

**Figure 2.** Conceptual diagram of the transition from abiotic to biotic oxygen evolution. Early Earth's abiotic processes (UV photolysis, mineral photocatalysis) produced small  $O_2$  amounts (left), later augmented by primitive enzymes like carbonic anhydrase. Integrating Mn cofactors into such enzymes led to proto-photosynthetic activity (middle), eventually giving rise to the Mn-based photosystem II in cyanobacteria. This enabled large-scale bicarbonate/water splitting and oxygenic photosynthesis, fueling the rise of atmospheric oxygen and complex life (right). Each box represents a stage in the evolution of  $O_2$  production.

## 2 Early abiotic oxygen production

Earth originated ~4.5 Ga ago, cooling ~100 Ma post-formation, leading to rock genesis (Wilde et al., 2001). Despite a significant rise in atmospheric  $O_2$  levels during the first GOE, ~2.5-2.3Ga ago, studies of redox-sensitive trace elements and isotopes in Archean sedimentary (metamorphic) rocks suggest the presence of  $O_2$  several hundred million years, or possibly over a billion years, before the emergence of photosynthetic cyanobacteria as illustrated in Fig. 3 (Fischer et al., 2016; Hohmann-Marriott and Blankenship, 2011; Xiong and Bauer, 2002).

Investigations into interstratified Fe and Ca-carbonate minerals within thick carbonate platforms (~2.9-2.8 Ga) of Canada's western Superior Province suggest that dynamic chemoclines, driven by oxygenic processes at platform edges, were common in the Archean eon. Dissolved

96 iron oxidation likely significantly influenced marine Ca-carbonate precipitation during that era  
 97 (Riding et al., 2022). Isotopic analysis of Mo in rocks from the ~2.95 Ga Sinqeni Formation,  
 98 Pongola Supergroup, South Africa, indicates that O<sub>2</sub> accumulation in shallow marine  
 99 environments commenced >500 Ma before the first GOE shown in Fig. 3 (Planavsky et al., 2014).  
 100 Additionally, high-resolution chem-stratigraphic analyses of redox-sensitive metals (Mo, Re) in  
 101 the late Archean Mount McRae Shale, Western Australia, suggest their introduction to Archean  
 102 oceans via oxidative weathering of crustal sulfides. This implies the existence of minimal oxygen  
 103 levels >50 Ma prior to the first GOE (Anbar et al., 2007). Moreover, chromium isotope and  
 104 redox-sensitive metal studies in the ~3-Ga-old Nsuze palaeosol and Ijzermyn iron formation  
 105 (Pongola Supergroup) indicate significant atmospheric oxygen presence at that epoch shown in  
 106 Fig. 3 (Crowe et al., 2013). An in-depth analysis of the Manzimnyama Banded Iron Formation  
 107 (BIF) from South Africa's Fig Tree Group indicates substantial oxygen levels in shallow marine  
 108 environments ~3.2 Ga ago (Satkoski et al., 2015). Lastly, iron isotope analysis from the Isua  
 109 Supracrustal Belt (ca. 3.77 Ga) in West Greenland suggests that iron oxidation played a pivotal  
 110 role in BIF deposition at that time (Czaja. et al., 2013).

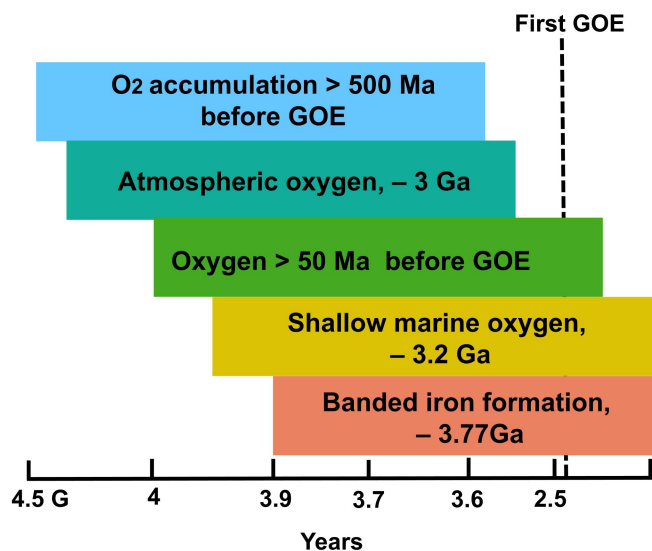

111  
 112  
 113 **Figure 3.** Timeline of early abiotic oxygenation events prior to the Great Oxidation Event (GOE).  
 114 Geochemical and isotopic evidence indicates that oxygen accumulation in Earth's environments  
 115 began over 500 million years before the GOE (~2.5–2.3 Ga). Trace metal signatures (Mo, Re, Cr),  
 116 iron isotopes, and banded iron formations (BIFs) reveal early oxygenic activity in shallow marine

environments (~3.2 Ga), atmospheric oxygen signals (~3.0 Ga), and oxygen-influenced BIF deposition as early as ~3.77 Ga. These findings suggest that localized oxygen production and redox cycling significantly predated the rise of oxygenic photosynthesis.

Despite the presence of oxygen since 3.8 Ga ago in the Archean eon, there remains considerable debate among scientists on whether the oxygen from that era to the rise of cyanobacteria 2.35 Ga ago was biologically generated throughout 1.4 Ga. The argument for oxygen generation by biological processes during this period is mainly supported by carbon isotope evidence and fossil records as described in Fig. 4. For example, researchers have found metamorphosed pelagic shale in West Greenland, dating to 3.7 Ga ago, with reduced carbon exhibiting  $\delta^{13}\text{C}$  values as low as  $-25.6\text{‰}$  PeeDee Belemnite (PDB) (Rosing and Frei, 2004). Additionally, negative  $\delta^{13}\text{C}$  values have been traced in organic matter from sedimentary rocks as old as 3.8 Ga (Schidlowski, 1988). Investigations of 2.724-Ga-old Tumbiana Formation stromatolites from Australia's Fortescue Group have shown that their thin layers' clusters of organic globules strikingly resemble organic-mineral structures in modern stromatolites (Lepot et al., 2008). Additionally, research on the 3.465-Ga-old Apex chert from the Warrawoona Group, Western Australia, has revealed 11 filamentous structures resembling cyanobacterial microfossils (Brasier et al., 2005; Schopf, 1993; Schopf and Packer, 1987). Furthermore, investigations of sedimentary rocks from the Barberton Supergroup in the Barberton Mountains of South Africa have identified numerous filamentous structures resembling cyanobacteria-like microorganisms at two distinct stratigraphic levels within the 3.5-Ga-old Onverwacht Group (Walsh and Lowe, 1985).

Increasing research has raised questions about the reliability of interpreting Archean carbon isotopes and microfossil evidence as indicators of oxygen emergence (Fischer et al., 2016; Hohmann-Marriott and Blankenship, 2011). Negative  $\delta^{13}\text{C}$  values are also present in organic compounds generated in numerous geological environments (McCollom and Seewald, 2006); moreover, the genetic machinery for carbon fixation is not exclusive to photosynthetic organisms (Lindell et al., 2005). Extensive analysis of microfossil-like structures found in 3.465-Ga-old Apex chert from the Warrawoona Group in Western Australia employed advanced techniques, including optical and electron microscopy, micro-Raman spectroscopy, etc.. These formations, previously identified as "microfossils" in metalliferous hydrothermal vein chert and volcanic glass,

are now recognized as "pseudofossils". They form from carbonaceous material reorganization during amorphous silica's recrystallization into spheroidal structures. It is plausible that carbon isotopes in Apex chert's carbonaceous material experienced fractionation within hydrothermal systems (Brasier et al., 2002; 2005). Furthermore, given hydrothermal and groundwater alterations in Apex chert, it is unlikely that it preserved early life forms (Pinti et al., 2009). Microscopic and Raman spectroscopic analyses of microfossils in Apex chert reveal filaments as mere quartz and hematite-filled cracks, with carbonaceous matter dispersed in the surrounding quartz matrix and not associated with these fissures (Marshall et al., 2011). Thus, oxygen presence before the first GOE likely resulted from abiotic geological processes of the Archean eon, not from oxygenic photosynthesis.

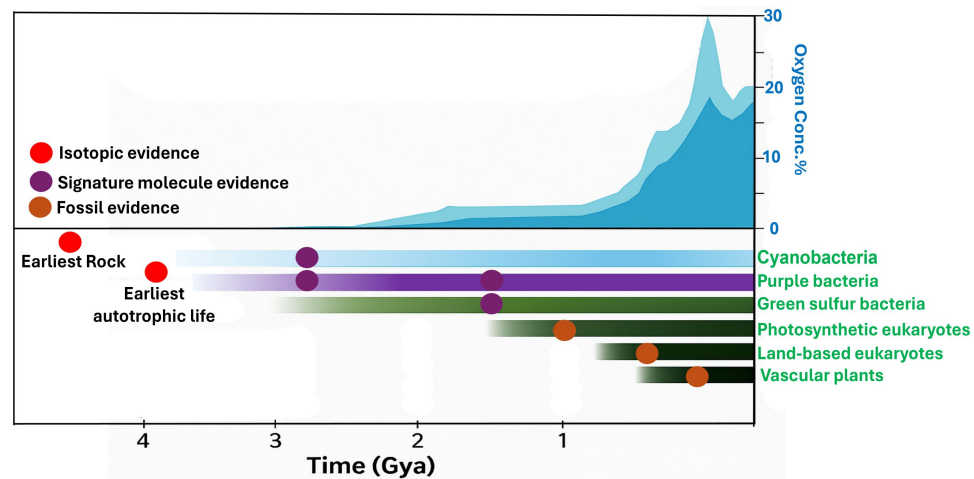

**Figure 4.** The Earth's geological history is linked to the emergence and evolution of photosynthesis. As labelled in the original publication (Hohmann-Marriott and Blankenship 2011), "minimum and maximum estimates for oxygen concentration are indicated by dark blue and light blue areas, respectively. The timeline highlights the appearance of major phototrophic and eukaryotic lineages alongside geochemical and fossil evidence, including isotopic (red), molecular biomarker (purple), and fossil (orange) signals. While early records such as isotopic signatures and purported microfossils from the Apex chert (~3.465 Ga) have been used to infer early life and oxygenic activity, recent studies challenge their biogenic origin. These "pseudofossils" and ambiguous  $\delta^{13}\text{C}$  values underscore the complexity of interpreting early biosignatures, as similar carbon isotope fractionation can occur in abiotic hydrothermal systems.



Land-based geological light-capturing systems and 'dark' oxygen production on the deep ocean floor provide stronger evidence for abiotic oxygen release. Land's geological light-capturing systems and "dark" oxygen on the deep ocean floor provide stronger evidence for abiotic oxygen release (Lu et al., 2019; Sweetman et al., 2024). Scientists employed electron microscopy, X-ray absorption spectroscopy, and micro-Raman spectroscopy to investigate semiconducting iron and manganese (oxyhydroxy) oxide mineral coatings on rock and soil surfaces. They discovered that these oxyhydroxy coatings function as "photoelectric devices," capable of absorbing light and converting it into electricity (Lu et al., 2019). In-situ benthic chamber experiments at 4,000m depth in the Pacific revealed that polymetallic nodules can markedly enhance oxygen levels, tripling ambient concentrations within 48 hours. Furthermore, these nodules displayed high voltage potentials, reaching up to 0.95V shown in Fig.5 (Sweetman et al., 2024).

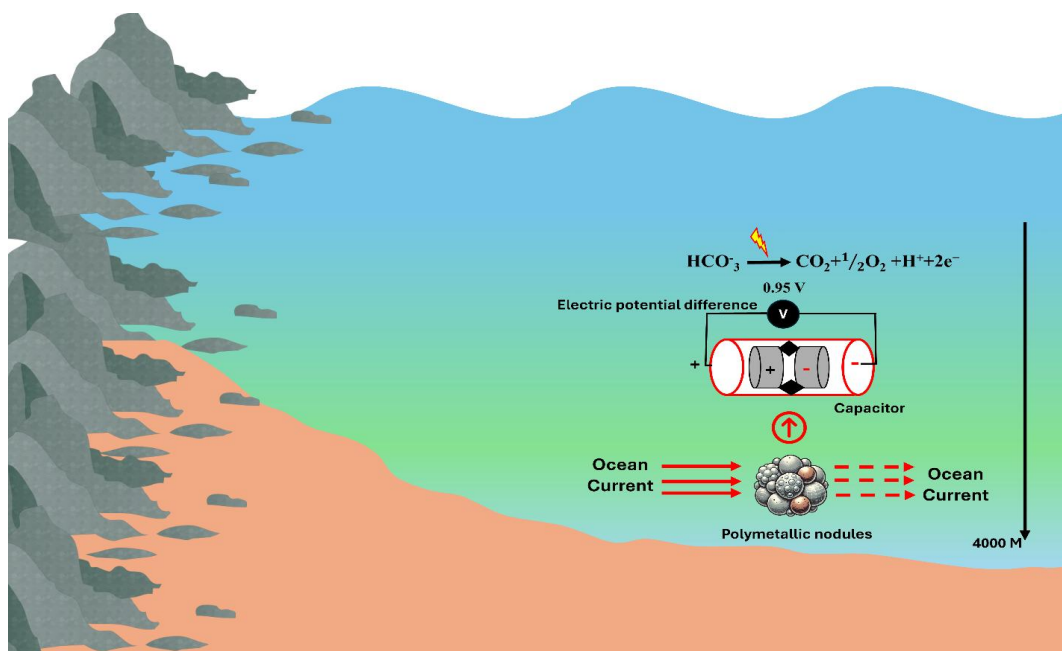

**Figure 5.** A schematic model showing the role of deep-sea polymetallic nodules, which act as energy storage systems, akin to capacitors, in the presence of ocean currents and hydrodynamic forces. The ocean currents flowing over the surface of these nodules generate an electric potential difference, as shown in 0.95 V. Although this voltage is insufficient to drive water molecule decomposition (which requires about 1.5 V), it is enough to facilitate the decomposition of  $\text{HCO}_3^-$ . This reaction leads to the release of  $\text{O}_2$  and  $\text{CO}_2$ . The process highlights an abiotic pathway for



oxygen generation, suggesting that non-biological sources of oxygen could have existed during the Archean eon. This discovery broadens our understanding of early Earth's oxygen generation mechanisms, indicating that these nodules may have contributed to oxygen production before the rise of biological photosynthesis.

Sunlight interaction with iron-manganese oxide "mineral coatings" on rocks facilitates a non-biological oxygen generation pathway. These semiconducting mineral layers absorb solar radiation, producing photoelectrons that catalyze redox reactions, transforming light into chemical energy. This enables the photo-catalytic breakdown of water or bicarbonate ions, yielding oxygen (Lu et al., 2019). Furthermore, polymetallic nodules on the abyssal seafloor serve as unique electrochemical reactors. Exposed to ocean currents and hydrodynamic forces, they harness various energy inputs on their surfaces, effectively functioning as capacitor (Wang et al., 2021). The generated surface voltage, inadequate for direct water molecule decomposition (~1.5 V needed) (Sweetman et al., 2024), but suffices for bicarbonate ion dissociation, resulting in oxygen release shown in Fig. 6 (Dismukes et al., 2001). This implies that non-biological O<sub>2</sub> sources were likely prevalent on Earth during the Archean eon. Absence of definitive carbon isotope and microfossil evidence from this era suggests that significant non-biological O<sub>2</sub> sources lend robust support to the hypothesis that O<sub>2</sub> existed pre-GOE. Furthermore, non-biological O<sub>2</sub> production mechanisms are akin to those of photosynthetic organisms. Moreover, organic carbon from non-biological processes shows isotopic traits similar to photosynthetic assimilation (McCollom and Seewald, 2006).

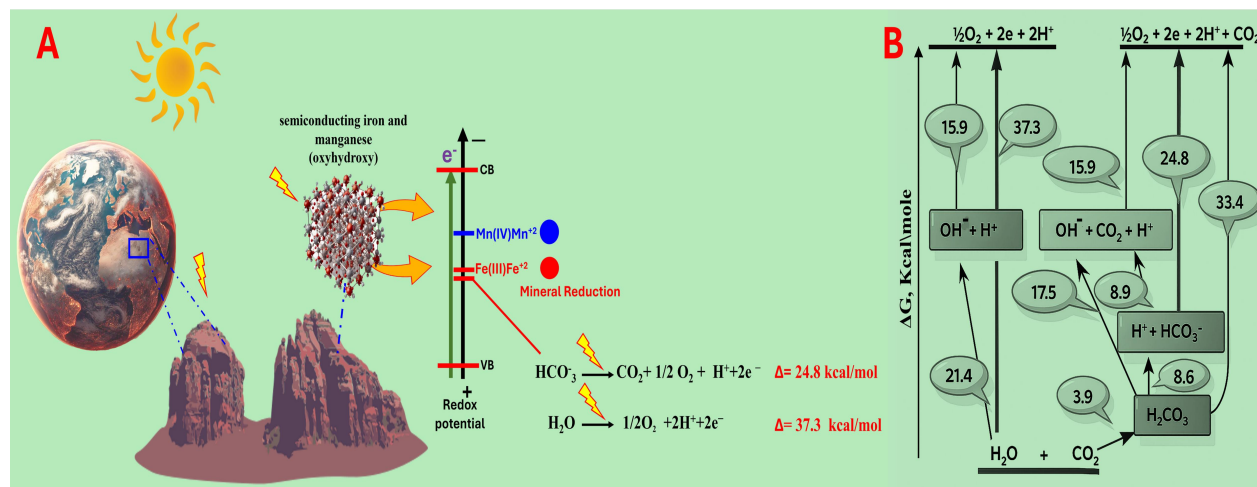

**Figure 6.** A conceptual model illustrating the light-driven abiotic oxygen release mechanism via semiconducting iron and manganese (oxyhydroxide) mineral coatings at the Earth's surface. This schematic highlights how sunlight interacts with these mineral coatings, commonly found on terrestrial rocks, to initiate redox reactions and release oxygen, a potential precursor to biological photosynthesis. Sunlight excites electrons ( $e^-$ ) in the semiconducting iron and manganese oxides, elevating them from the valence band (VB) to the conduction band (CB). This electron excitation creates a redox potential sufficient to reduce  $Fe^{3+}$  to  $Fe^{2+}$  and  $Mn^{4+}$  to  $Mn^{2+}$ , as indicated by the energy levels on the right. Simultaneously, the photogenerated holes facilitate the oxidation of bicarbonate ( $HCO_3^-$ ) and water ( $H_2O$ ), resulting in the release of molecular oxygen ( $O_2$ ) and carbon dioxide ( $CO_2$ ), with respective energy changes of  $\Delta = 24.8$  kcal/mol for bicarbonate and  $\Delta = 37.3$  kcal/mol for water. These mineral-mediated photolysis reactions represent a purely abiotic oxygen production pathway, active during the Archean eon, long before the emergence of biological photosynthesis. Notably, this pathway expands the traditional view of solar energy utilization beyond the organic biosphere (plants and microbes), incorporating the geosphere's inorganic, semiconducting materials as functional participants in Earth's early redox and atmospheric evolution. In this context, Fe and Mn oxides serve as photoactive platforms that catalyze electron transfer and oxygen evolution, mechanistically mimicking the light-driven charge separation in modern photosystems. This provides a plausible evolutionary bridge between geochemical and biochemical oxygen production, supporting the central hypothesis of this paper: that photosynthetic oxygen evolution may have inherited functional elements from ancient mineral-based photochemistry (A). Gibbs standard free energy of  $H_2O$  and  $HCO_3^-$  as substrates of oxygen evolution, under thermodynamic equilibrium, respectively (B) (Dismukes et al. 2001)

### 3 Potential ancestor of Photosystem II

Photosynthetic  $O_2$  evolution is catalyzed by the  $Mn_4CaO_5$  cluster in PSII of cyanobacteria and photosynthetic eukaryotes, facilitated by a suite of enzymes and proteins (Cardona et al., 2019). The  $Mn_4CaO_5$  cluster in PSII represents an extraordinarily efficient oxygen-evolving complex, which has been pivotal in elevating atmospheric oxygen concentrations by six orders of magnitude (Catling and Zahnle, 2020). This raises an intriguing question: How did the process of oxygen production evolve from inefficient geological mechanisms to the highly efficient photosynthetic oxygen evolution system? Focusing solely on the  $Mn_4CaO_5$  oxygen-evolving

cluster in PSII and setting aside the evolution of other associated enzymes and proteins, we propose that the precursor to this cluster could be carbonic anhydrase.

Carbonic Anhydrases (EC 4.2.1.1) constitute a vast enzyme family with over 2,000 identified members in diverse organisms, including bacteria, archaea, fungi, plants, and animals (Badger and Price, 1994; Moroney et al., 2001; Wu & Rao, 2023). These enzymes within a diverse superfamily of metalloenzymes facilitate the reversible CO<sub>2</sub> hydration to bicarbonate. Without CA, this typically takes around a minute, but with CA, the reaction time is drastically reduced to 10<sup>-6</sup> seconds (Prince and Woolley, 1973). CAs, versatile biocatalysts, are crucial in various chemical and biochemical processes. Notably, transition metal-incorporating CAs not only supply protons and electrons but also exhibit redox functionalities (Mesbahuddin et al., 2021). This is why they are deemed precursors to PSII's Mn<sub>4</sub>CaO<sub>5</sub> oxygen-evolving complex.

Thylakoid CA (tCA) and PSII exhibit significant functional parallels across various dimensions (Wu, 2021). Specific anions and cations critical for photosynthetic processes, such as Cl<sup>-</sup>, Ca<sup>2+</sup>, and Mn<sup>2+</sup>, influence both tCA and PS II activities comparably (Lu and Stemler, 2007; Stemler, 1986; 1997). High-intensity light inhibits the activity of both tCA and PS II, causing photoinhibition due to electron transport disruption (Kyle et al., 1984; Stemler, 1986). Moreover, far-red light enhances the activity of both tCA and the Hill reaction (Govindjee et al. 1960; Stemler, 1997). Crucially, tCA's sensitivity to alterations in ambient redox potential mirrors PS II's behavior (Bearden and Malkin, 1973; Moubarak-Milad and Stemler, 1994). PSII not only displays traits of photosynthetic O<sub>2</sub> evolution but also exhibits CA activity (Dai et al., 2001; Ignatov et al., 2011; Khristin et al., 2004; Koroidov et al., 2014; Shitov et al., 2025; Stemler, 1986). PSII encompasses both extrinsic and intrinsic CAs, which are inseparable from it (Enami et al., 2008; Hillier et al., 2006; Ignatov et al., 2011; Lu and Stemler, 2002; Moskvina et al., 2004; Shitov et al., 2009; 2025; Villarejo et al., 2002). PS II's oxygen-evolving activity, linked to intrinsic CA, is clearly associated with the Mn cluster, while its CA activity is independent of the Mn cluster's presence (Shitov et al., 2009). Moreover, CA(Mn), where manganese replaces zinc at the catalytic site, has demonstrated the capacity to produce O<sub>2</sub> in the presence of H<sub>2</sub>O<sub>2</sub> and HCO<sub>3</sub><sup>-</sup> (Okrasa and Kazlauskas, 2006). Hence, it is reasonable to hypothesize that the integration of manganese into PSII's intrinsic carbonic anhydrase (CA) is pivotal for photosynthetic O<sub>2</sub> evolution, with the CA at the manganese-substituted active site potentially serving as the precursor to PSII's Mn<sub>4</sub>CaO<sub>5</sub> O<sub>2</sub>-evolving complex.

To date, nine genetically distinct CA families have been identified, each characterized by unique amino acid sequences. These families are classified as  $\alpha$ -,  $\beta$ -,  $\gamma$ -,  $\delta$ -,  $\epsilon$ -,  $\zeta$ -,  $\eta$ -,  $\theta$ -, and  $\iota$ -CAs. Despite functional similarities, they lack significant sequence identity and have evolved independently (Wu and Rao, 2023). The  $\gamma$ -CA, originating 3-4 Ga ago, epitomizes Earth's earliest CA form (Hewett-Emmett and Tashian, 1996; Tripp et al., 2004). The enzyme's active center metal ion is Fe(II), aligning its existence closely with the genesis of life itself (Knoll and Nowak, 2017). Non-biological oxygen production preceded the advent of primitive photosynthetic cyanobacteria by roughly 1 Ga, albeit in minuscule quantities (Des Marais, 2000; Fischer et al., 2016).

Approximately 3.8 Ga, oceans were largely anoxic, with Fe(II) levels 10,000-100,000 times higher than Mn(II) (Anbar, 2008). Despite Fe(II) and Mn(II)'s similar ionic radii, Mn rarely substitutes for Fe in  $\gamma$ -CA, leading to the scarcity of  $\gamma$ -CA[Mn] in the early Archean eon. This precluded the use of Mn-based redox reactions for phototrophy, allowing only photoferrotrophic organisms to emerge (Czaja et al., 2013). As  $\gamma$ -CA[Mn] levels progressively increased, oxygen-evolving photosynthetic efficiency gradually enhanced. However, the inefficient oxygen evolution by  $\gamma$ -CA[Mn] led to the evolution of solely phototrophic organisms during the mid-Archaean era (Tice and Lowe, 2004).

In the early Archean, seawater pH was between 6.5 and 7.0 (Halevy and Bachan, 2017). Without CA, CO<sub>2</sub> hydrolysis in seawater to bicarbonate is severely constrained. Analogous to the Mn<sub>4</sub>CaO<sub>5</sub> cluster's photosynthetic O<sub>2</sub> evolution, a  $\gamma$ -CA with trace  $\gamma$ -CA[Mn] complex fulfills multiple key roles. Primarily, it functions as a CA, catalyzing CO<sub>2</sub> hydrolysis to produce substantial bicarbonate. Moreover, with ample bicarbonate, a minor Mn fraction in  $\gamma$ -CA[Mn] reacts to form Mn(II)-bicarbonate complexes (Baranov et al., 2000; 2004; Khorobrykh et al., 2008). This interaction reduces the system's redox potential from 1.19 V to 0.52-0.68 V, thereby initiating manganese oxidation over iron, as the redox potential for trivalent iron is 0.77 V (Lovyagina and Semin, 2022). Ultimately, within the Mn(III, IV)-bicarbonate complex, enzymatic release of bicarbonate ions leads to their subsequent oxidation, liberating O<sub>2</sub> and CO<sub>2</sub> (Stemler, 1986). Upon comparing the redox potentials, the thermodynamic favorability of bicarbonate decomposition versus Mn(II) oxidation to Mn(III,IV) is evident (Dasgupta et al., 2006; Kozlov et al., 2004; 2010; Yun et al., 1997). Notably, similar processes occur in PS II (Dai et al., 2001; Klimov et al., 1995; Shevela et al., 2008).

Rock weathering significantly contributes Mn<sup>2+</sup> to Earth's aquatic systems; elevated Mn<sup>2+</sup>

levels are observed in both surface and deep waters of Archaean basins (Fischer et al., 2015). Mn(II) oxidation necessitates robust oxidants, e.g., O<sub>2</sub> or its derivatives, for redox cycling. This process occurs at a notably slow pace, even under oxygen-rich conditions, especially without biocatalysts (Morgan 2005). Mn-rich Fe formations were found in the Koegas Subgroup, Griqualand West structural sub-basin, Kaapvaal Craton, South Africa, dating back ~2.415 Ga (Johnson et al., 2013). A Mn-enriched thin horizon was also identified in the Turee Creek strata of Western Australia, dating to the same period (Williford et al., 2011). Elevated Mn levels, relative to other Archaean successions, were detected in early Witswatersrand and Mozaan Basin sediments, South Africa, dating to ~2.9 Ga (Planavsky et al., 2014; Smith and Beukes, 2023). Evidently, biocatalysts akin to  $\gamma$ -CA[Mn] likely facilitated the manganese oxidation cycle during the Archaean era. With  $\gamma$ -CA[Mn]'s enhanced bicarbonate decomposition capacity, increased manganese oxidation ensues, resulting in elevated manganese levels in sediments. This, in turn, may explain that the Griqualand West sub-basin's sediments (~2.415 Ga) exhibit higher manganese levels than those of the older Witswatersrand and Mozaan Basins (~2.9 Ga).

CA is crucial for calcium carbonate deposition (Kim et al., 2012; Rodriguez et al., 2019). Similarly, the  $\gamma$ -CA[Mn]-like enzyme, facilitating bicarbonate decomposition and oxygen release, also fosters carbonate precipitation. Organic carbon signatures in 3.8-Ga-old meta-carbonate rocks from West Greenland's Archaean Isua supracrustal belt have been identified (Schidlowski, 1988), along with clusters of organic microspheres in thin stromatolite layers from the 2.724-Ga-old Tumbiana Formation of Australia's Fortescue Group (Lepot et al., 2008). Considering the  $\gamma$ -CA[Mn]-like enzyme's capacity to break down bicarbonate and release O<sub>2</sub>, it is reasonable to deduce that this organic carbon was not generated by cyanobacteria-like photosynthetic organisms. Instead, organic carbon in meta-carbonates is likely derived from geological processes, whereas that in stromatolites may have been produced by macromolecules akin to  $\gamma$ -CA[Mn]. Thus, despite the presence of organic carbon in 2.5 Ga-old stromatolite carbonates, no cyanobacteria-like microfossils have been identified within these structures (Fischer et al., 2016). Fig. 7 depicts the hypothesis that  $\gamma$ -CA[Mn] enzyme may serve as a precursor to primitive PSII, offering a logical rationale for these observations. Nonetheless, further chemical, geological, and biological evidence is required to validate this hypothesis conclusively.

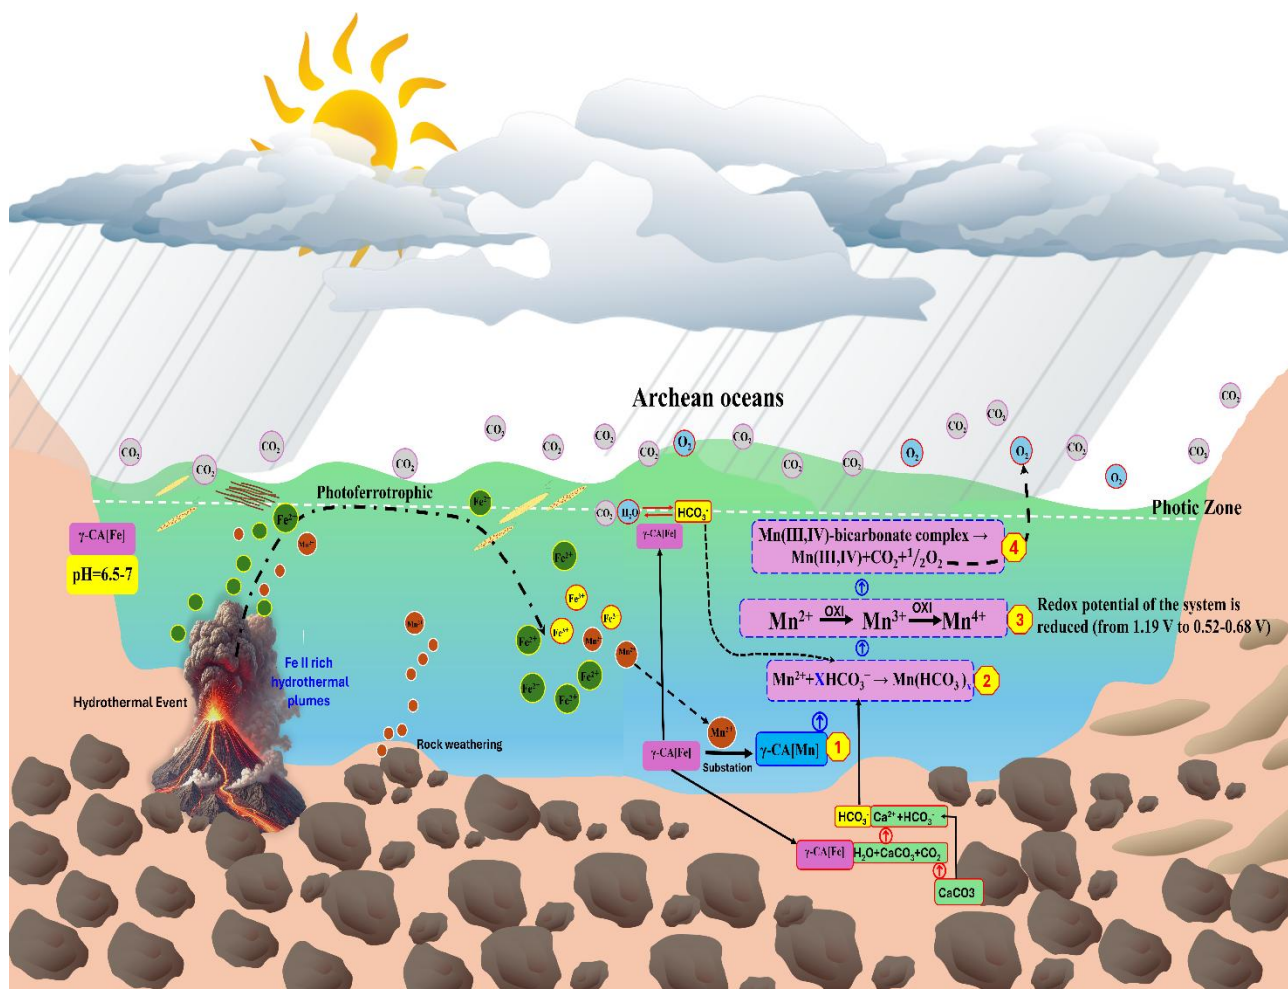

**Figure 7.** Illustration of an early Archean ocean ecosystem where hydrothermal vents release large amounts of  $\text{Fe}^{2+}$  (ferrous iron), which is oxidized to  $\text{Fe}^{3+}$  (ferric iron) through photoferrotrophy by early microorganisms using sunlight. This oxidation process, along with  $\text{Mn}^{2+}$  cycling, leads to the substitution of Fe by Mn in enzyme complexes like  $\gamma\text{-CA}[\text{Mn}]$ , potentially ancestral to Photosystem II. These processes contribute to carbonate rock dissolution,  $\text{CO}_2$  cycling, and oxygen release, gradually reducing the system's redox potential. Overall, this ecosystem reflects the interplay between iron, manganese, and carbon cycles, laying the groundwork for oxygenic photosynthesis and early atmospheric oxygenation.

#### 4 Two-substrate photosynthetic oxygen evolution

The evolution of geological oxygen and the production of oxygen analogous to  $\gamma\text{-CA}[\text{Mn}]$  likely involve the thermodynamically favorable decomposition of bicarbonate to release oxygen.

However, it is widely believed that bicarbonate functions solely as a regulator in photosynthesis, not as a substrate for oxygen release, based on PSII crystallography conducted under non-physiological conditions (Vinyard and Govindjee, 2024). While photosynthetic O<sub>2</sub> evolution can be replicated *in vitro*, it significantly differs from that which occurs *in vivo*. The photosynthetic O<sub>2</sub> evolution in chloroplast thylakoid membranes is regulated by physiological factors such as pH and redox potential. Studies involving hydroxylamine disruption and PSII crystallography conducted *in vitro* require analysis that takes into account normal physiological conditions (Wu and Guo, 2024). At pH 6.0, hydroxylamine-induced disruption of PSII's oxygen-evolving center didn't result in CO<sub>2</sub> release (Shevela et al., 2008; Ulas et al., 2008), but this doesn't conclusively refute bicarbonate binding sites in PSII. This is because prior to hydroxylamine's interaction with the oxygen-evolving center, bicarbonate dissociation was already triggered by weak acid treatment.

In fact, both tCA and PSII can actively regulate the pH and redox potential of their surrounding environment *in vivo* (Brinkert et al., 2016; Moubarak-Milad and Stemler, 1994). Under normal physiological conditions, bicarbonate binding to the oxygen-evolving complex of PSII is facilitated. This binding is influenced by both crystal formation conditions and the plant's physiological state. Bicarbonate binding to the oxygen-evolving complex is absent in PSII crystals grown at pH < 7 (Bhowmick et al. 2023; Lol et al., 2005; Umena et al., 2011). However, bicarbonate binding to the oxygen-evolving center was noted in PSII crystals crystallized *in vitro* at pH 7.5 (Ferreira et al., 2004). This phenomenon can be explained as follows: at pH < 7.0, the bicarbonate binding force to the oxygen-evolving complex of PSII is significantly reduced. Since the photolysis of bicarbonate requires only two-thirds of the free energy needed for water photolysis, it proceeds at a significantly faster rate (Dismukes et al., 2001). Despite potential binding events, their detection with current instruments is challenging due to the ultra-short lifespan of the S<sub>4</sub> transition state within the Kok-Joliot cycle (Guo et al., 2024; Wu and Guo, 2024). In contrast, at pH 7.5, the likelihood of bicarbonate binding to the oxygen-evolving complex increases substantially, making it more readily observable.

An increasing number of studies have indicated that bicarbonate may serve as a substrate in the process of photosynthetic oxygen evolution. Besides the bicarbonate effect and the thermodynamic advantages of bicarbonate photolysis, photosynthetic oxygen evolution in chloroplasts appears to be dependent on CO<sub>2</sub> (Walker et al., 1971). Bicarbonate acts as a crucial



ligand in forming the manganese cluster on PSII's electron donor side (Klimov et al., 1995), functioning as both an electron donor and proton acceptor within the photosynthetic oxygen evolution center (Allakhverdiev et al., 1997; Dai et al., 2001). Moreover, bicarbonate drives O<sub>2</sub> and CO<sub>2</sub> generation under illumination (Dai et al., 2001), with CO<sub>2</sub> formation from bicarbonate documented on both the electron donor and acceptor sides of PSII (Shevela et al., 2020). Significantly, bicarbonate binding sites have been identified both on the electron acceptor side of PSII and the electron donor side at the core of oxygen evolution (Stemler and Castelfranco, 2023). Conclusively, the above evidence supports that PSII's electron donor side facilitates a photosynthetic oxygen evolution reaction, employing bicarbonate as the substrate:  $\text{HCO}_3^- \rightarrow 1/2 \text{O}_2 + 2\text{e}^- + \text{H}^+ + \text{CO}_2$ .

Water, another substrate in the photosynthetic O<sub>2</sub> evolution, likely evolved in plants due to reduced inorganic carbon (bicarbonate/CO<sub>2</sub>) availability. During the Archean eon (~2.5 Ga ago), atmospheric CO<sub>2</sub> levels ranged from 0.9 to 900 kPa, contrasting sharply with the period from 75 Ma ago to the pre-industrial Holocene, where CO<sub>2</sub> concentrations hovered around 0.03 kPa. Similarly, the bicarbonate levels in Archean seawater varied between 15 and 15,000 mM, whereas from 75 Ma ago to the Holocene, bicarbonate levels in seawater were reduced to just two mM (Dismukes et al., 2001).

Although bicarbonate undergoes rapid isotopic exchange with water during photosynthesis, our recent experiments employing dual-element (C,O) bidirectional stable isotope labeling of bicarbonate have demonstrated that the evolution of O<sub>2</sub> during photosynthesis is a process involving dual substrates. Specifically, bicarbonate is involved in the S<sub>4</sub>→S<sub>0</sub> transition of the Kok–Joliot cycle, while water participates in the S<sub>2</sub>→S<sub>3</sub> transition shown in Fig.8 (Guo et al., 2024). The S<sub>3</sub>→S<sub>4</sub>→S<sub>0</sub> transition features a low energy barrier and an ultra-short-lived S<sub>4</sub> state, posing challenges for detection with current instruments (Guo et al., 2024; Wu and Guo, 2024).

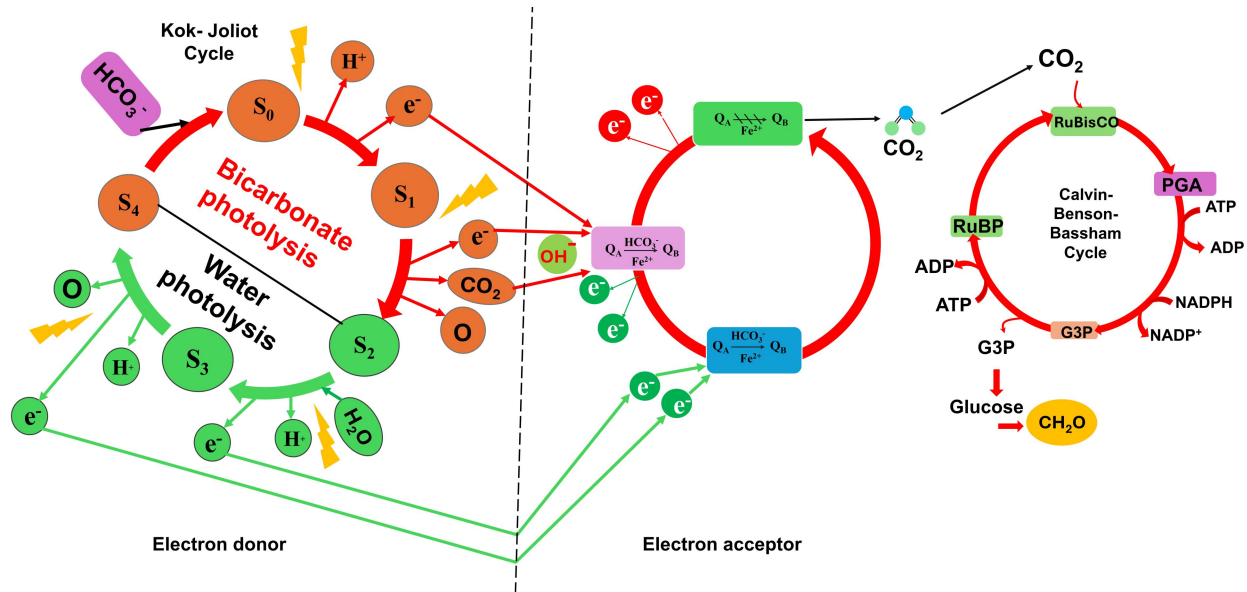

**Figure 8.** Schematic representation of bicarbonate and water photolysis as electron donors driving photosynthetic carbon fixation. Bicarbonate photolysis, which requires lower energy than water photolysis, facilitates the release of electrons and the production of CO<sub>2</sub>, which becomes the exclusive carbon source for assimilation in the Calvin-Benson-Bassham cycle. CO<sub>2</sub> is incorporated via RuBisCO into the cycle, enabling the production of G3P and ultimately glucose, thereby linking light-driven electron flow with global biogeochemical and elemental cycling. This integrated mechanism underscores the critical role of bicarbonate in sustaining photosynthetic energy conversion and carbon assimilation on Earth (adapted from Guo et al.,2024).

The dissolution of silicate and carbonate rocks is Earth's primary geological process for CO<sub>2</sub> sequestration. Silicate rock dissolution occurs through the reaction:  $[\text{CO}_2 + \text{Ca}(\text{Mg})\text{SiO}_3 \rightarrow \text{Ca}(\text{Mg})\text{CO}_3 + \text{SiO}_2]$ . Carbonate rock dissolution, or karstification, follows the equation:  $[\text{Ca}(\text{Mg})\text{CO}_3 + \text{H}_2\text{O} + \text{CO}_2 \rightleftharpoons \text{Ca}(\text{Mg})^{2+} + 2\text{HCO}_3^-]$ . The interplay between karstification and photosynthesis is crucial for maintaining the equilibrium of inorganic carbon in the atmosphere and oceans (Wu and Rao, 2023). Throughout geological history, elevated atmospheric CO<sub>2</sub> levels have coincided with reduced photosynthetic activity. For example, early Paleozoic's high CO<sub>2</sub> was linked to terrestrial plants' absence, whereas Permian-Carboniferous's lower CO<sub>2</sub> levels corresponded with vascular plants' emergence, development, and proliferation (Berner, 1990; Knoll et al., 2017; Moulton and Berner, 1998). The rise of efficient eukaryotic photosynthetic organisms 75 Ma ago necessitated coping with scarce inorganic carbon (bicarbonate/CO<sub>2</sub>).

Consequently, these organisms evolved the capability to leverage abundant water to evolve oxygen and enhance inorganic carbon assimilation. These photosynthetic organisms have undergone evolutionary milestones, encompassing the development of PS I and PS II, the evolution of the photosynthetic oxygen-evolving center and associated proteins, and the emergence of electron transport and photosynthetic phosphorylation mechanisms (Badger and Price, 1994; Fischer et al., 2016; Hohmann-Marriott and Blankenship, 2011; Xiong and Bauer, 2002). These evolutionary adaptations, which facilitate the release of oxygen from water, likely enhanced photosynthesis efficiency by significantly boosting oxygen production under conditions of insufficient inorganic carbon in the environment.

Optimal energy use and photosynthetic efficiency are achieved through equivalent photolysis of  $\text{HCO}_3^-$  and  $\text{H}_2\text{O}$ , exemplifying the coupling between karstification and photosynthesis shown in Fig.9. Since photolysis of bicarbonate requires less energy than water photolysis, it results in  $\text{CO}_2$  being the sole carbon source for photosynthetic inorganic carbon assimilation. This  $\text{CO}_2$  is then fully incorporated into the Calvin-Benson-Bassham cycle by RuBisCO, driving the biogeochemical cycle and maintaining elemental equilibrium on Earth shown in Fig.8 (Wu and Rao, 2023).

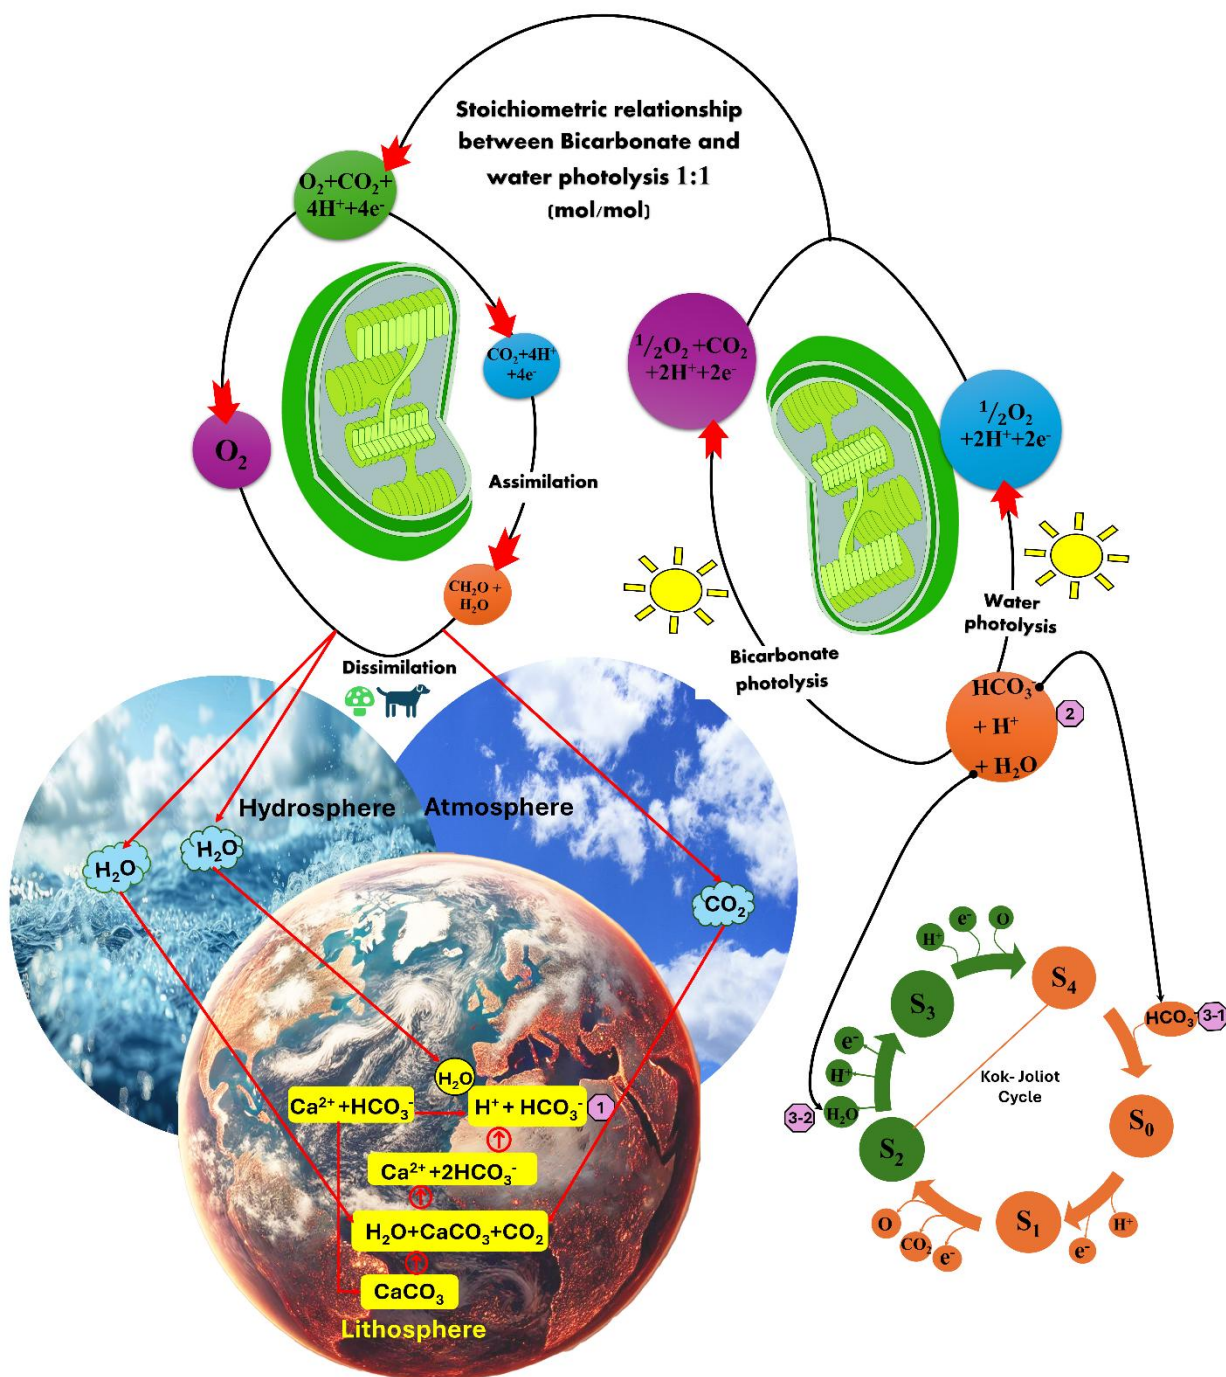

**Figure 9.** The dual-substrate nature of photosynthetic oxygen evolution, involving both  $\text{HCO}_3^-$  and  $\text{H}_2\text{O}$ , with bicarbonate playing a key role in the  $\text{S}_4 \rightarrow \text{S}_0$  transition and water in the  $\text{S}_2 \rightarrow \text{S}_3$  transition of the Kok-Joliot cycle. Bicarbonate photolysis is more energy-efficient than water, enabling faster oxygen release. The process operates in a 1:1 molar ratio between bicarbonate and water photolysis, driving oxygen and  $\text{CO}_2$  production. The image also connects this mechanism to

Earth's geological carbon cycles, highlighting how the dissolution of carbonate and silicate rocks, coupled with photosynthesis, regulates atmospheric carbon levels. This model reflects the evolutionary adaptation of early photosynthetic organisms to utilize water and bicarbonate for oxygen generation, which plays a critical role in maintaining Earth's elemental balance.

Investigating PSII's dual-substrate nature is pivotal for advancing artificial photosynthetic reactors, which could bolster carbon sequestration and oxygen production to mitigate climate change. Insights from this research may also guide agricultural innovations, enhancing plant photosynthesis and resilience to high CO<sub>2</sub> levels, emulating ancient photosynthetic adaptations.

## Conclusions

The complex biochemical intricacies of modern photosynthesis may trace back to Earth's primordial geological processes, providing a transformative perspective on the continuum between inorganic and organic evolution. Building upon this profound insight, we propose that the biochemical mechanism responsible for photosynthetic oxygen evolution in plants evolved gradually from simpler, abiotic geological oxygen production processes. Origins of bicarbonate photolysis in photosynthetic O<sub>2</sub> evolution may trace back to early abiotic O<sub>2</sub>-generating systems. This hypothesis is a potentially groundbreaking perspective on the evolution of life, suggesting that key aspects of photosynthesis, once believed to be exclusive to biological systems, may have originated in pre-biological processes. This concept underscores the seamless transition from inorganic to organic processes in nature. Validating this hypothesis would profoundly impact our comprehension of life's origins and the evolution of intricate biochemical processes. It would also imply that the mechanisms underlying photosynthesis are deeply rooted in ancient abiotic processes. Further research is essential to substantiate this claim, but pursuing this line of inquiry could open new avenues for understanding the origins of photosynthesis and the intricate interplay between inorganic and organic chemistry in shaping Earth's biosphere.

**Data availability:** Data will be made available on request.

## Authors' Contributions

**Y.W.** Conceptualization, writing raw manuscript, and validation, **M.A.** writing and review and

visualization, **C.L.** validation and revision. All authors have read and agreed to the published version of the manuscript.

**Conflict of Interest:** The authors declare no conflict of interest.

## **Acknowledgements**

We extend our sincere gratitude to G. Govindjee and A. Stemler for their invaluable support, insightful comments, and assistance in revising this manuscript. Their contributions enhanced the quality of our work.

## **References**

- Allakhverdiev, S. I., Yruela, I., Picorel, R.: Bicarbonate is an essential constituent of the water-oxidizing complex of photosystem II. *Proc. Natl Acad. Sci. USA*, 94(10), 5050-5054. <https://doi.org/10.1073/pnas.94.10.5050>, 1997.
- Anbar, A. D.: Elements and evolution. *Science*, 322(5907), 1481–1483. <https://doi.org/10.1126/science.1163100>, 2008.
- Anbar, A. D., Duan, Y., Lyons, T. W., Arnold, G. L., Kendall, B., Creaser, R. A., Kaufman, A. J., Gordon, G. W., Scott, C., and Garvin, J.: A whiff of oxygen before the great oxidation event? *Science*, 317, 1903–1906. <https://doi.org/10.1126/science.1140325>, 2007
- Badger, M. R., and Price, G. D. :The role of carbonic anhydrase in photosynthesis. *Annu. Rev. Plant Physiol.*, 45, 369–392. <https://doi.org/10.1146/annurev.pp.45.060194.002101>, 1994.
- Baranov, S. V, Ananyev, G. M., Klimov, V. V, & Dismukes, G. C.: Bicarbonate accelerates assembly of the inorganic core of the water - oxidizing complex in manganese - depleted photosystem II: A proposed biogeochemical role for atmospheric carbon dioxide in oxygenic photosynthesis. *Biochemistry*, 39(20), 6060–6065. <https://doi.org/10.1021/bi992682c>, 2000.
- Baranov, S. V, Tyryshkin, A. M., Katz, D., Dismukes, G. C., Ananyev, G. M., and Klimov, V. V.: Bicarbonate is a native cofactor for assembly of the manganese cluster of the photosynthetic water oxidizing complex. Kinetics of reconstitution of O<sub>2</sub> evolution by photoactivation. *Biochemistry*, 43(7), 2070–2079. <https://doi.org/10.1021/bi034858n>, 2004.

513 Bearden, A. J., and Malkin, R.: Oxidation-reduction potential dependence of low - temperature  
 514 photoreactions of chloroplast photosystem II. *Biochim. Biophys. Acta - Bioenergetics*, 325(2),  
 515 266–274. [https://doi.org/10.1016/0005-2728\(73\)90102-3](https://doi.org/10.1016/0005-2728(73)90102-3), 1973.  
 516 Berner, R. A.: Atmospheric carbon dioxide levels over Phanerozoic time. *Science*, 249(4975),  
 517 1382–1386. <https://doi.org/10.1126/science.249.4975.1382>, 1990.  
 518 Berner, R. A.: Atmospheric oxygen over Phanerozoic time. *Proc. Natl Acad. Sci. USA*, 96(20),  
 519 10955–10957. <https://doi.org/10.1073/pnas.96.20.10955>, 1999.  
 520 Bhowmick, A., Hussein, R., Bogacz, I., Simon, P. S., Ibrahim, M., Chatterjee, R., Doyle, M. D.,  
 521 Cheah, M. H., Fransson, T., and Chernev, P. : Structural evidence for intermediates during O<sub>2</sub>  
 522 formation in photosystem II. *Nature*, 617, 629–636. <https://doi.org/10.1038/s41586-023-06038-z>,  
 523 2023.  
 524 Brasier, M. D., Green, O. R., Jephcoat, A. P., Kleppe, A. K., Van Kranendonk, M. J., Lindsay, J. F.,  
 525 Steele, A., and Grassineau, N. V.: Questioning the evidence for Earth’s oldest fossils. *Nature*, 416,  
 526 76–81. <https://doi.org/10.1038/416076a>, 2002.  
 527 Brasier, M. D., Green, O. R., Lindsay, J. F., McLoughlin, N., Steele, A., and Stoakes, C. : Critical  
 528 testing of Earth’s oldest putative fossil assemblage from the ~3.5 Ga Apex chert, Chinaman Creek,  
 529 Western Australia. *Precambrian Res.*, 140(1-2), 55–102.  
 530 <https://doi.org/10.1016/j.precamres.2005.06.008>, 2005.  
 531 Brinkert, K., De Causmaecker, S., Krieger-Liszkay, A., Fantuzzi, A., and Rutherford, A. W.:  
 532 Bicarbonate - induced redox tuning in Photosystem II for regulation and protection. *Proc. Natl*  
 533 *Acad. Sci. USA*, 113(43), 12144–12149. <https://doi.org/10.1073/pnas.1608862113>, 2016.  
 534 Cardona, T., Sánchez-Baracaldo, P., Rutherford, A. W., and Larkum, A. W.: Early Archean  
 535 eonorigin of Photosystem II. *Geobiology*, 17(2), 127–150. <https://doi.org/10.1111/gbi.12323>, 2019.  
 536 Catling, D. C., and Zahnle, K. J.: The Archean eon atmosphere. *Sci. Adv.*, 6(9), eaax1420.  
 537 <https://doi.org/10.1126/sciadv.aax1420>, 2020.  
 538 Crowe, S. A., Døssing, L. N., Beukes, N. J., Bau, M., Kruger, S. J., Frei, R., and Canfield, D. E.:  
 539 Atmospheric oxygenation three billion years ago. *Nature*, 501(7468), 535–538,  
 540 <https://doi.org/10.1038/nature12426>, 2013.  
 541 Czaja, A. D., Johnson, C. M., Beard, B. L., Roden, E. E., Li, W., and Moorbath, S.: Biological Fe  
 542 oxidation controlled deposition of banded iron formation in the ca. 3770 Ma Isua Supracrustal



543 Belt (West Greenland). Earth Planet Sci. Lett., 363, 192–203.  
 544 <https://doi.org/10.1016/j.epsl.2012.12.025>, 2013.

545 Dai, X., Yu, Y., Zhang, R., Yu, X., He, P., and Xu, C.: Relationship among photosystem II carbonic  
 546 anhydrase, extrinsic polypeptides and manganese cluster. Chin. Sci. Bull. 46, 406–408,  
 547 <https://doi.org/10.1007/BF03183276>, 2001.

548 Dasgupta, J., Tyryshkin, A. M., Kozlov, Y. N., Klimov, V. V, and Dismukes, G. C.. Carbonate  
 549 complexation of  $Mn^{2+}$  in the aqueous phase: redox behavior and ligand binding modes by  
 550 electrochemistry and EPR spectroscopy. J. Phys. Chem. B, 110(10), 5099–5111.  
 551 <https://doi.org/10.1021/jp055213v>, 2006

552 Des Marais, D. J.: When did photosynthesis emerge on Earth? Science, 289(5485), 1703–1705.  
 553 <https://doi.org/10.1126/science.289.5485.1703>, 2000.

554 Dismukes, G. C., Klimov, V. V, Baranov, S. V, Kozlov, Y. N., DasGupta, J., and Tyryshkin, A.:  
 555 The origin of atmospheric oxygen on Earth: the innovation of oxygenic photosynthesis. Proc. Natl  
 556 Acad. Sci. USA, 98(5), 2170–2175. <https://doi.org/10.1073/pnas.061514798>, 2001.

557 Enami, I., Okumura, A., Nagao, R., Suzuki, T., Iwai, M., and Shen, J.-R.: Structures and functions  
 558 of the extrinsic proteins of photosystem II from different species. Photosynth. Res., 98(1-3), 349–  
 559 363. <https://doi.org/10.1007/s11120-008-9343-9>, 2008.

560 Ferreira, K. N., Iverson, T. M., Maghlaoui, K., Barber, J., and Iwata, S.: Architecture of the  
 561 photosynthetic oxygen-evolving center. Science, 303(5665), 1831–1838.  
 562 <https://doi.org/10.1126/science.1093087>, 2004.

563 Fischer, W. W., Hemp, J., and Johnson, J.: Evolution of oxygenic photosynthesis. Annu. Rev. Earth  
 564 Planet Sci., 44, 647–683. <https://doi.org/10.1146/annurev-earth-060313-054810>, 2016.

565 Fischer, W. W., Hemp, J., and Johnson, J. E.: Manganese and the evolution of photosynthesis. Orig.  
 566 Life Evol. Biosph., 45(3), 351–357. <https://doi.org/10.1007/s11084-015-9442-5>, 2015.

567 Govindjee, R., Thomas, J. B. and Rabinowitch, E.: “Second Emerson Effect” in the Hill reaction  
 568 of *Chlorella* cells with quinone as oxidant. Science 132(3424), 421.  
 569 <https://doi.org/10.1126/science.132.3424.421>, 1960.

570 Guo, S., Wu, Y., and Aboueldahab, M. : Rapid oxygen isotopic exchange between bicarbonate and  
 571 water during photosynthesis. J. Photochem. Photobiol. B: Biol., 255, 112924.  
 572 <https://doi.org/10.1016/j.jphotobiol.2024.112924>, 2024.

573 Halevy, I., and Bachan, A.:The geologic history of seawater pH. *Science*, 355(6329), 1069–1071.  
574 <https://doi.org/10.1126/science.aal4151>, 2017.

575 Hewett-Emmett, D., and Tashian, R. E.: Functional diversity, conservation, and convergence in  
576 the evolution of the  $\alpha$ -,  $\beta$ -, and  $\gamma$ -carbonic anhydrase gene families. *Mol. Phylogenet. Evol.*, 5(1),  
577 50–77. <https://doi.org/10.1006/mpev.1996.0006>, 1996.

578 Hillier, W., McConnell, I., Badger, M. R., Boussac, A., Klimov, V. V, Dismukes, G. C., &  
579 Wydrzynski, T.: Quantitative assessment of intrinsic carbonic anhydrase activity and the capacity  
580 for bicarbonate oxidation in photosystem II. *Biochemistry*, 45(7), 2094–2102.  
581 <https://doi.org/10.1021/bi051892o>, 2006.

582 Hohmann-Marriott, M. F., and Blankenship, R. E.: Evolution of photosynthesis. *Annu. Rev. Plant*  
583 *Biol.*, 62, 515–548. <https://doi.org/10.1146/annurev-arplant-042110-103811>, 2011.

584 Holland, H. D.:The oxygenation of the atmosphere and oceans. *Philos. Trans. R. Soc. B Biol. Sci.*,  
585 361(1470), 903–915. <https://doi.org/10.2337/diacare.26.3.905>, 2006.

586 Ignatova, L. K., Rudenko, N. N., Mudrik, V. A., Fedorchuk, T. P., and Ivanov, B. N.: Carbonic  
587 anhydrase activity in *Arabidopsis thaliana* thylakoid membrane and fragments enriched with PSI  
588 or PSII. *Photosynth. Res.*, 110(2), 89–98. <https://doi.org/10.1007/s11120-011-9699-0>, 2011.

589 Johnson, J. E., Webb, S. M., Thomas, K., Ono, S., Kirschvink, J. L., and Fischer, W.  
590 W.:Manganese-oxidizing photosynthesis before the rise of cyanobacteria. *Proc. Natl Acad. Sci.*  
591 *USA*, 110(28), 11238–11243. <https://doi.org/10.1073/PNAS.1305530110>, 2013.

592 Khorobrykh, A. A., Terentyev, V.V, Zharmukhamedov, S. K., and Klimov, V. V.:Redox interaction  
593 of Mn–bicarbonate complexes with reaction centres of purple bacteria. *Philos. Trans. R. Soc. B*  
594 *Biol. Sci.*, 363(1494), 1245–1251. <https://doi.org/10.1098/rstb.2007.2221>, 2008.

595 Khristin, M. S., Ignatova, L. K., Rudenko, N. N., Ivanov, B. N., and Klimov, V. V.:Photosystem II  
596 associated carbonic anhydrase activity in higher plants is situated in core complex. *FEBS Lett.*,  
597 577(1–2), 305–308. <https://doi.org/10.1016/j.febslet.2004.10.001>, 2004.

598 Kim, I. G., Jo, B. H., Dong, G. K., Chang, S. K., Choi, Y. S., Cha, H. J.: Biomineralization - based  
599 conversion of carbon dioxide to calcium carbonate using recombinant carbonic  
600 anhydrase. *Chemosphere*, 87(10), 1091-1096. <https://doi.org/10.1016/j.chemosphere.2012.02.003>.  
601 2012.

Klimov, V.V, Allakhverdiev, S. I., Baranov, S.V, and Feyziev, Y. M.: Effects of bicarbonate and  
 formate on the donor side of photosystem II. *Photosynth. Res.*, 46(1 - 3), 219–225.  
<https://doi.org/10.1007/BF00020434>, 1995.

Knoll, A. H., and Nowak, M. A.: The timetable of evolution. *Sci. Adv.*, 3(5), e1603076.  
<https://doi.org/10.1126/sciadv.1603076>, 2017.

Koroidov, S., Shevela, D., Shutova, T., Samuelsson, G., and Messinger, J.: Mobile hydrogen  
 carbonate acts as proton acceptor in photosynthetic water oxidation. *Proc. Natl Acad. Sci. USA*  
 111(17), 6299–6304. <https://doi.org/10.1073/pnas.1323277111>, 2014.

Kozlov, Y. N., Tikhonov, K. G., Zastrizhnaya, O. M., and Klimov, V. V.: pH dependence of the  
 composition and stability of Mn (III)–bicarbonate complexes and its implication for redox  
 interaction of Mn(II) with photosystem II. *J. Photochem. Photobiol. B: Biol.*, 101(3), 362–366.  
<https://doi.org/10.1016/j.jphotobiol.2010.08.009>, 2010.

Kozlov, Y. N., Zharmukhamedov, S. K., Tikhonov, K. G., Dasgupta, J., Kazakova, A. A.,  
 Dismukes, G. C., and Klimov, V. V.: Oxidation potentials and electron donation to photosystem II  
 of manganese complexes containing bicarbonate and carboxylate ligands. *Phys. Chem. Chem.*  
*Phys.*, 6, 4905–4911. <https://doi.org/10.1039/b406569g>, 2004.

Kyle, D. J., Ohad, I., and Arntzen, C. J. : Membrane protein damage and repair: selective loss of a  
 quinone-protein function in chloroplast membranes. *Proc. Natl Acad. Sci. USA*, 81(13), 4070–  
 4074. <https://doi.org/10.1073/pnas.81.13.4070>, 1984.

Lepot, K., Benzerara, K., Brown, G. E., and Philippot, P.: Microbially influenced formation of  
 2,724-million-year-old stromatolites. *Nat. Geosci.* 1(2), 118–121. <https://doi.org/10.1038/ngeo107>,  
 2008.

Lindell, D., Jaffe, J. D., Johnson, Z. I., Church, G. M., and Chisholm, S. W. Photosynthesis genes  
 in marine viruses yield proteins during host infection. *Nature*, 438(7064), 86–89.  
<https://doi.org/10.1038/nature04111>, 2005.

Loll, B., Kern, J., Saenger, W., Zouni, A., and Biesiadka, J.: Towards complete cofactor  
 arrangement in the 3.0 Å resolution structure of photosystem II. *Nature*, 438(7070), 1040–1044.  
<https://doi.org/10.1038/nature04224>, 2005.

Lovyagina, E. R., and Semin, B. K.: Competitive interaction of Mn (II) and Fe (II) cations with the  
 high-affinity Mn-binding site of the photosystem II: evolutionary aspect. *Orig. Life Evol. Biosph.*,  
 52(1 - 3), 113–128. <https://doi.org/10.1007/s11084-022-09625-8>, 2022.

633 Lu, A., Li, Y., Ding, H., Xu, X., Li, Y., Ren, G., Liang, J., Liu, Y., Hong, H., and Chen, N.:  
 634 Photoelectric conversion on Earth's surface via widespread Fe-and Mn-mineral coatings. *Proc.*  
 635 *Natl Acad. Sci. USA*, 116(20), 9741–9746. <https://doi.org/10.1073/pnas.1902473116>, 2019.  
 636 Lu, Y. K., and Stemler, A. J.: Extrinsic photosystem II carbonic anhydrase in maize mesophyll  
 637 chloroplasts. *Plant Physiol.*, 128(2), 643–649. [https://doi.org/10.1016/S0020-1383\(98\)00114-4](https://doi.org/10.1016/S0020-1383(98)00114-4),  
 638 2002.  
 639 Lu, Y. K., and Stemler, A. J.: Differing responses of the two forms of photosystem II carbonic  
 640 anhydrase to chloride, cations, and pH. *Biochim. Biophys. Acta-Bioenergetics*, 1767(6), 633–638.  
 641 <https://doi.org/10.1016/j.bbabo.2006.12.011>, 2007.  
 642 Marshall, C. P., Emry, J. R., and Olcott Marshall, A.: Haematite pseudomicrofossils present in the  
 643 3.5-billion-year-old Apex Chert. *Nat. Geosci.*, 4, 240–243. <https://doi.org/10.1038/ngeo1084>,  
 644 2011.  
 645 McCollom, T. M., and Seewald, J. S.: Carbon isotope composition of organic compounds  
 646 produced by abiotic synthesis under hydrothermal conditions. *Earth Planet Sci. Lett.*, 243(1-2),  
 647 74–84. <https://doi.org/10.1016/j.epsl.2006.01.027>, 2006.  
 648 Mesbahuddin, M. S., Ganesan, A., and Kalyaanamoorthy, S.: Engineering stable carbonic  
 649 anhydrases for CO<sub>2</sub> capture: A critical review. *Protein Eng. Des. Sel.*, 34, 1–12.  
 650 <https://doi.org/10.1093/protein/gzab021>, 2021.  
 651 Morgan, J. J.: Kinetics of reaction between O<sub>2</sub> and Mn (II) species in aqueous solutions. *Geochim.*  
 652 *Cosmochim. Acta*, 69(1), 35–48. <https://doi.org/10.1016/j.gca.2004.06.013>, 2005.  
 653 Moroney, J. V., Bartlett, S. G., Samuelsson, G.: Carbonic anhydrases in plants and algae: Invited  
 654 review. *Plant Cell Environ.*, 24, 141–153. <https://doi.org/10.1111/j.1365-3040.2001.00669.x>, 2001.  
 655 Moskvina, O. V., Shutova, T. V., Khristin, M. S., Ignatova, L. K., Villarejo, A., Samuelsson, G.,  
 656 Klimov, V. V., & Ivanov, B. N. (2004). Carbonic anhydrase activities in pea  
 657 thylakoids. *Photosynth. Res.*, 79, 93–100. <https://doi.org/10.1023/B:PRES.0000011925.93313.db>,  
 658 2004  
 659 Moubarak-Milad, M., and Stemler, A. J.: Oxidation-reduction potential dependence of  
 660 photosystem II carbonic anhydrase in maize thylakoids. *Biochemistry*, 33(14), 4432–4438.  
 661 <https://doi.org/10.1021/bi00180a042>, 1994.  
 662 Moulton, K. L., and Berner, R. A.: Quantification of the effect of plants on weathering: studies in  
 663 Iceland. *Geology*, 26(10), 895–898. [https://doi.org/10.1130/0091-7613\(1998\)0262.3.CO;2](https://doi.org/10.1130/0091-7613(1998)0262.3.CO;2), 1998.

664 Okrasa, K., and Kazlauskas, R. J.: Manganese-substituted carbonic anhydrase as a new  
 665 peroxidase. *Chem. Eur. J.*, 12(6), 1587–1596. <https://doi.org/10.1002/chem.200501413>, 2006.

666 Pinti, D. L., Mineau, R., and Clement, V.: Hydrothermal alteration and microfossil artefacts of  
 667 the 3,465-million-year-old Apex chert. *Nat. Geosci.*, 2(9), 640–643.  
 668 <https://doi.org/10.1038/ngeo601>, 2009.

669 Planavsky, N. J., Asael, D., Hofmann, A., Reinhard, C. T., Lalonde, S. V, Knudsen, A., Wang, X.,  
 670 Ossa Ossa, F., Pecoits, E., and Smith, A. J. B.: Evidence for oxygenic photosynthesis half a billion  
 671 years before the Great Oxidation Event. *Nature Geoscience*, 7(4), 283–  
 672 286. <https://doi.org/10.1038/ngeo2122>, 2014.

673 Prince, R. H., and Woolley, P. R.: On the mechanism of action of carbonic anhydrase. *Bioorg.*  
 674 *Chem.*, 2(4), 337–344. [https://doi.org/10.1016/0045-2068\(73\)90034-5](https://doi.org/10.1016/0045-2068(73)90034-5), 1973.

675 Riding, R., Liang, L., and Fralick, P.: Oxygen-induced chemocline precipitation between Archean  
 676 Fe-rich and Fe-poor carbonate seas. *Precambrian Res.*, 383, 106902.  
 677 <https://doi.org/10.1016/j.precamres.2022.106902>, 2022.

678 Rodriguez, N., Navarro, C., Cizer, Ö., Kudłacz, K., Ibañez-Velasco, A., Ruiz-Agudo, C., Elert, K.,  
 679 Burgos-Cara, A., and Ruiz-Agudo, E.: The multiple roles of carbonic anhydrase in calcium  
 680 carbonate mineralization. *Cryst. Eng. Comm.*, 21, 7407–7423.  
 681 <https://doi.org/10.1039/C9CE01544B>, 2019.

682 Rosing, M. T., and Frei, R.: U-rich Archean sea-floor sediments from Greenland – indications  
 683 of >3700 Ma oxygenic photosynthesis. *Earth Planet Sci. Lett.*, 217(3 - 4), 237–244.  
 684 [https://doi.org/10.1016/S0012-821X\(03\)00609-5](https://doi.org/10.1016/S0012-821X(03)00609-5), 2004.

685 Satkoski, A. M., Beukes, N. J., Li, W., Beard, B. L., Johnson, C. M.: A redox-stratified ocean 3.2  
 686 billion years ago. *Earth Planet Sci. Lett.*, 430, 43–53.  
 687 <https://doi.org/10.1016/j.epsl.2015.08.007>, 2015.

688 Schidlowski, M. A.: 3,800-million-year isotopic record of life from carbon in sedimentary  
 689 rocks. *Nature*, 333, 313–318. <https://doi.org/10.1038/333313a0>, 1988.

690 Schirrmeister, B. E., de Vos, J. M., Antonelli, A., and Bagheri, H. C.: Evolution of multicellularity  
 691 coincided with increased diversification of cyanobacteria and the Great Oxidation Event. *Proc.*  
 692 *Natl Acad. Sci. USA*, 110(5), 1791–1796. <https://doi.org/10.1073/pnas.1209927110>. 2013.

693 Schopf, J. W.: Microfossils of the Early Archean Apex chert: new evidence of the antiquity of life.  
 694 *Science*, 260(5108), 640–646. <https://doi.org/10.1126/science.260.5108.640>, 1993.

695 Schopf, J. W., and Packer, B. M.: Early Archean (3.3-billion to 3.5-billion-year-old) microfossils  
 696 from Warrawoona Group, Australia. *Science*, 237(4810), 70–73.  
 697 <https://doi.org/10.1126/science.11539686>, 1987.

698 Shevela, D., Do, H., Fantuzzi, A., Rutherford, A. W., and Messinger, J.: Bicarbonate-mediated  
 699 CO<sub>2</sub> formation on both sides of photosystem II. *Biochemistry*, 59(26), 2442 - 2449.  
 700 <https://doi.org/10.1021/acs.biochem.0c00208>, 2020.

701 Shevela, D., Su, J.-H., Klimov, V., and Messinger, J.: Hydrogencarbonate is not a tightly bound  
 702 constituent of the water-oxidizing complex in photosystem II. *Biochim. Biophys. Acta (BBA)-*  
 703 *Bioenergetics*, 1777(6), 532–539. <https://doi.org/10.1016/j.bbabi.2008.03.006>, 2008.

704 Shitov, A.V., Pobeguts, O. V, Smolova, T. N., Allakhverdiev, S. I., and Klimov, V. V.: Manganese-  
 705 dependent carboanhydrase activity of photosystem II proteins. *Biochemistry (Moscow)*, 74, 509–  
 706 517. <https://doi.org/10.1134/S0006297909050058>, 2009.

707 Shitov, A.V., Terentyev, V.V., and Govindjee G.: High and unique carbonic anhydrase activity of  
 708 Photosystem II from *Pisum sativum*: Measurements by a new and very sensitive fluorescence  
 709 method, *Plant Physiol. Biochem.*, 221, 109516, <https://doi.org/10.1016/j.plaphy.2025.109516>,  
 710 2025.

711 Smith, A. J. B., and Beukes, N. J.: The paleoenvironmental implications of pre-Great Oxidation  
 712 Event manganese deposition in the MesoArchean eonIjzermijn Iron Formation Bed, Mozaan  
 713 Group, Pongola Supergroup, South Africa. *Precambrian Res.*, 384, 106922.  
 714 <https://doi.org/10.1016/j.precamres.2022.106922>, 2023.

715 Stemler, A. J.:Carbonic anhydrase associated with thylakoids and photosystem II particles from  
 716 maize. *Biochim. Biophys. Acta - Bioenergetics*, 850(1), 97–107. [https://doi.org/10.1016/0005-](https://doi.org/10.1016/0005-2728(86)90013-7)  
 717 [2728\(86\)90013-7](https://doi.org/10.1016/0005-2728(86)90013-7), 1986.

718 Stemler, A. J.:The case for chloroplast thylakoid carbonic anhydrase. *Physiol. Plant*, 99(2), 348–  
 719 353. <https://doi.org/10.1111/j.1399-3054.1997.tb05423.x>,1997.

720 Stemler, A. J., and Castelfranco, P. A.: The bicarbonate ion remains a critical factor in  
 721 photosynthetic oxygen evolution. *Int. J. Life Sci.*, 12(2), 77–92. [https://doi.org/10.5958/2319-](https://doi.org/10.5958/2319-1198.2023.00009.X)  
 722 [1198.2023.00009.X](https://doi.org/10.5958/2319-1198.2023.00009.X), 2023.

723 Sweetman, A. K., Smith, A. J., Jonge, D. S. W. D., Hahn, T., Schroedl, P., Silverstein, M.,  
 724 Andrade, C., Edwards, R. L., Lough, A., J. M., Woulds, C.: Evidence of dark oxygen production

at the abyssal seafloor. *Nat. Geosci.*, 17, 737–739. <https://doi.org/10.1038/s41561-024-01480-8>,  
2024.

Tice, M. M., and Lowe, D. R.:Photosynthetic microbial mats in the 3,416-Myr-old ocean. *Nature*,  
431(7008), 549–552. <https://doi.org/10.1038/nature02888>, 2004.

Tripp, B. C., Bell, C. B., Cruz, F., Krebs, C., and Ferry, J. G.:A role for iron in an ancient carbonic  
anhydrase. *J. Biol. Chem.*, 279(8), 6683–6687. <https://doi.org/10.1074/jbc.M311648200>, 2004.

Ulas, G., Olack, G., and Brudvig, G. W.: Evidence against bicarbonate bound in the O<sub>2</sub>-evolving  
complex of photosystem II. *Biochemistry*, 47(10), 3073–3075. <https://doi.org/10.1021/bi8000424>,  
2008.

Umena, Y., Kawakami, K., and Shen, J. R.:Crystal structure of oxygen-evolving photosystem II at  
a resolution of 1.9 Å. *Nature*, 473, 55–60. <https://doi.org/10.1038/nature09913>, 2011.

Villarejo, A., Shutova, T., Moskvina, O., Forssén, M., Klimov, V. V, and Samuelsson, G.:A  
photosystem II-associated carbonic anhydrase regulates the efficiency of photosynthetic oxygen  
evolution. *EMBO J.* 21(8), 1930–1938. <https://doi.org/10.1093/emboj/21.8.1930>, 2002.

Vinyard, D. J. and Govindjee, G.: Bicarbonate is a key regulator but not a substrate for O<sub>2</sub>  
evolution in Photosystem II. *Photosynthesis Research*, 162, 9-99. <https://doi.org/10.1007/s11120-024-01111-8>, 2024.

Walker, D. A., McCormick, A. V., and Stokes, D. M.:CO<sub>2</sub>-dependent oxygen evolution by  
envelope - free chloroplasts. *Nature*, 233, 346–347. <https://doi.org/10.1038/233346a0>, 1971.

Walsh, M. M., and Lowe, D. R.:Filamentous microfossils from the 3,500-Myr-old Onverwacht  
Group, Barberton Mountain Land, South Africa. *Nature*, 314, 530–532.  
<https://doi.org/10.1038/314530a0>, 1985.

Wang, Y., Liu, X., Chen, T., Wang, H., Zhu, C., Yu, H., Song, L., Pan, X., Mi, J., and Lee, C.:An  
underwater flag-like triboelectric nanogenerator for harvesting ocean current energy under  
extremely low velocity condition. *Nano Energy*, 90, 106503.  
<https://doi.org/10.1016/j.nanoen.2021.106503>, 2021.

Wilde, S. A., Valley, J. W., Peck, W. H., and Graham, C. M: Evidence from detrital zircons for the  
existence of continental crust and oceans on the Earth 4.4 Gyr ago. *Nature*, 409, 175–178.  
<https://doi.org/10.1038/35051550>, 2001.

Williford, K. H., Van Kranendonk, M. J., Ushikubo, T., Kozdon, R., and Valley, J. W.:  
Constraining atmospheric oxygen and seawater sulfate concentrations during Paleoproterozoic



glaciation: In situ sulfur three-isotope microanalysis of pyrite from the Turee Creek Group,  
 Western Australia. *Geochimica et Cosmochimica Acta*, 75(19), 5686–5705.  
<https://doi.org/10.1016/j.gca.2011.07.010>, 2011.

Wu, Y.:Is bicarbonate directly used as substrate to participate in photosynthetic oxygen  
 evolution? *Acta Geochim.*, 40, 650–658. <https://doi.org/10.1007/s11631-021-00484-0>, 2021.

Wu, Y.:Combined effect of bicarbonate and water in photosynthetic oxygen evolution and carbon  
 neutrality. *Acta Geochim.*, 42(1), 77–88. <https://doi.org/10.1007/s11631-022-00580-9>, 2023.

Wu, Y., and Guo, S.:The photosynthetic oxygen evolution does not exclude the important role and  
 contribution of bicarbonate photolysis. *Acta Geochim.*, 43, 174–179.  
<https://doi.org/10.1007/10.1007/s11631-023-00649-z>, 2024.

Wu, Y., and Rao, S.:Root-derived bicarbonate assimilation in plants. Springer Nature Singapore.  
<https://doi.org/10.1007/978-981-99-4125-4>, 2023.

Xiong, J., and Bauer, C. E.: Complex evolution of photosynthesis. *Annu. Rev. Plant Biol.*, 53,  
 503–521. <https://doi.org/10.1146/annurev.arplant.53.100301.135212>, 2002.

Yun, K., Kazakova, A. A., and Klimov, V. V.:Changes in the redox potential and catalase activity  
 of Mn<sup>2+</sup> ions during formation of Mn-bicarbonate complexes. *Membr. Cell Biol.*, 11(1), 115–120.  
 1997.
